1 **Title:** SARS-CoV-2 evolution and patient immunological history shape the breadth and  
2 potency of antibody-mediated immunity

3  
4 **Authors:** Maria Manali<sup>1\*</sup>, Laura A. Bissett<sup>1\*</sup>, Julien A. R. Amat<sup>1,2</sup>, Nicola Logan<sup>1</sup>, Sam Scott<sup>1</sup>,  
5 Ellen C. Hughes<sup>1</sup>, William T. Harvey<sup>1</sup>, Richard Orton<sup>1</sup>, Emma C. Thomson<sup>1</sup>, Rory N.  
6 Gunson<sup>3</sup>, Mafalda Viana<sup>4#</sup>, Brian Willett<sup>1#</sup> and Pablo R Murcia<sup>1#</sup>.

7  
8 **Affiliations:**

9  
10 <sup>1</sup> MRC-University of Glasgow Centre for Virus Research. Glasgow, United Kingdom.

11 <sup>2</sup> School of Veterinary Medicine, College of Medical, Veterinary and Life Sciences, University  
12 of Glasgow, Glasgow, United Kingdom.

13 <sup>3</sup> West of Scotland Specialist Virology Centre, NHS Greater Glasgow and Clyde, Glasgow,  
14 United Kingdom.

15 <sup>4</sup> Institute of Biodiversity, Animal Health and Comparative Medicine, University of Glasgow,  
16 Glasgow, United Kingdom.

17  
18  
19 \* Equal contribution

20 # Co-corresponding authors

21  
22 **Short title:** SARS-CoV-2 exposure history shapes antibody-mediated immunity

23  
24 **Keywords:** SARS-CoV-2; immunological history; antibody-mediated immunity; virus  
25 neutralisation, virus evolution.

26  
27 **Abstract**

28  
29 Since the emergence of SARS-CoV-2, humans have been exposed to distinct SARS-CoV-2  
30 antigens, either by infection with different variants, and/or vaccination. Population immunity is  
31 thus highly heterogeneous, but the impact of such heterogeneity on the effectiveness and  
32 breadth of the antibody-mediated response is unclear. We measured antibody-mediated  
33 neutralisation responses against SARS-CoV-2<sub>Wuhan</sub>, SARS-CoV-2 $\alpha$ , SARS-CoV-2 $\delta$  and  
34 SARS-CoV-2 $\omicron$  pseudoviruses using sera from patients with distinct immunological histories,  
35 including naive, vaccinated, infected with SARS-CoV-2<sub>Wuhan</sub>, SARS-CoV-2 $\alpha$  or SARS-CoV-2 $\delta$ ,  
36 and vaccinated/infected individuals. We show that the breadth and potency of the antibody-  
37 mediated response is influenced by the number, the variant, and the nature (infection or  
38 vaccination) of exposures, and that individuals with mixed immunity acquired by vaccination  
39 and natural exposure exhibit the broadest and most potent responses. Our results suggest  
40 that the interplay between host immunity and SARS-CoV-2 evolution will shape the  
41 antigenicity and subsequent transmission dynamics of SARS-CoV-2, with important  
42 implications for future vaccine design.

## 44 **Author Summary**

45 Neutralising antibodies provide protection against viruses and are generated because of  
46 vaccination or prior infections. The main target of anti-SARS-CoV-2 neutralising antibodies is  
47 a protein called Spike, which decorates the viral particle and mediates viral entry into cells. As  
48 SARS-CoV-2 evolves, mutations accumulate in the spike protein, allowing the virus to escape  
49 antibody-mediated immunity and decreasing vaccine effectiveness. Multiple SARS-CoV-2  
50 variants have appeared since the start of the COVID-19 pandemic, causing various waves of  
51 infection through the population and infecting -in some cases- people that had been previously  
52 infected or vaccinated. Since the antibody response is highly specific, individuals infected with  
53 different variants are likely to have different repertoires of neutralising antibodies. We studied  
54 the breadth and potency of the antibody-mediated response against different SARS-CoV-2  
55 variants using sera from vaccinated people as well as from people infected with different  
56 variants. We show that potency of the antibody response against different SARS-CoV-2  
57 variants depends on the particular variant that infected each person, the exposure type  
58 (infection or vaccination) and the number and order of exposures. Our study provides insight  
59 into the interplay between virus evolution and immunity, as well as important information for  
60 the development of better vaccination strategies.

## 61 **Introduction**

62 Severe acute respiratory syndrome coronavirus 2 (SARS-CoV-2) emerged in December  
63 2019[1] causing the largest pandemic of the XXI century. Since the start of the pandemic,  
64 different viral lineages emerged, exhibiting highly dynamic transmission patterns[2-5]. This is  
65 illustrated by the epidemiology of COVID-19 in the United Kingdom since the first introduction  
66 of SARS-CoV-2 in late February 2020, when the Wuhan strain (SARS-CoV-2<sub>W</sub>) was first  
67 reported. A D614G variant of the Wuhan strain circulated almost exclusively until September  
68 of the same year, when the alpha strain (SARS-CoV-2<sub>α</sub>) appeared, initially in the Southeast  
69 of England[2]. By December 2020, SARS-CoV-2<sub>α</sub> was the dominating variant. At this point in  
70 time, the UK started a COVID-19 vaccination program that took place with unprecedented pace:  
71 by July 1<sup>st</sup>, 2021, ~47 million people (mainly adults) had received at least one vaccine dose[6].  
72 However, during this period, a new variant (delta, SARS-CoV-2<sub>δ</sub>) emerged in India, reaching  
73 the UK in April 2021, and quickly became the most prevalent lineage, until November 2021,  
74 when the omicron variant (SARS-CoV-2<sub>ο</sub>) was introduced and quickly replaced SARS-CoV-  
75 2<sub>δ</sub>. Over a period of approximately 2 years (February 2020 to March 2022) the UK population  
76 experienced four COVID-19 pandemic waves, each of them caused by a different SARS-CoV-  
77 2 variant (Wuhan, alpha, delta and omicron). In addition, SARS-CoV-2<sub>δ</sub> and SARS-CoV-2<sub>ο</sub>  
78 infections have been reported in individuals that had been previously vaccinated or infected

79 by preceding variants[7, 8]. As a result, population immunity against SARS-CoV-2 is likely to  
80 be highly heterogeneous. The impact of such immunological heterogeneity on SARS-CoV-2  
81 fitness is far from clear. As antibody-mediated immunity is considered a correlate of  
82 protection[9, 10], identifying the factors that affect the humoral immune response is key for  
83 COVID-19 preparedness and to design more effective vaccines. Our overall objective was to  
84 quantify the breadth and potency of antibodies elicited by different immune histories against  
85 distinct SARS-CoV-2 variants. To this end, we measured antibody-mediated immunity against  
86 SARS-CoV-2<sub>w</sub>, SARS-CoV-2<sub>α</sub>, SARS-CoV-2<sub>δ</sub>, and SARS-CoV-2<sub>o</sub> using convalescent serum  
87 samples from the Glasgow patient population collected between March 31<sup>st</sup>, 2020, and  
88 September 22<sup>nd</sup>, 2021. Our sampling strategy captured the complex immunological landscape  
89 described above and included sera from naive, vaccinated, infected, as well as vaccinated  
90 and infected individuals. Importantly, by combining patient metadata (date of positive PCR)  
91 with virus genomic epidemiology (prevalence of circulating lineages over time) we were able  
92 to select confidently serum samples from patients exposed to three major variants that  
93 circulated in the UK (Wuhan, alpha and delta).

94

## 95 Results

96 A schematic description of the study is shown in Fig 1. Serum samples (n=353) from  
97 biobanked material that had been collected for serological surveillance studies[11] were  
98 selected. The immunological history of each patient at the time of sampling was compiled  
99 based on serological status using an ELISA assay that tested for SARS-CoV-2 spike 1 (S1)  
100 and receptor binding domain (S-RBD)[11] together with metadata associated with each clinical  
101 specimen. Associated metadata consisted of date of serum collection, SARS-CoV-2 PCR  
102 status (including date and result of diagnosis) and vaccination status (including date of  
103 vaccination and number of doses). Samples were initially classified in four broad groups: *naive*  
104 (N, 30 samples), *vaccinated* (V, 55 samples) *infected* (I, 91 samples) and *infected and*  
105 *vaccinated* ( $I_v$ , 177 samples). Further, sera from the I and  $I_v$  group were stratified based on  
106 the infecting variant as *infected-Wuhan* ( $I_w$ , 37 samples), *infected-alpha* ( $I_\alpha$ , 39 samples),  
107 *infected-delta* ( $I_\delta$ , 15 samples), *infected-Wuhan-vaccinated* ( $I_{wv}$ , 60 samples), *infected-alpha-*  
108 *vaccinated* ( $I_{\alpha v}$ , 69 samples), and *infected-delta-vaccinated* ( $I_{\delta v}$ , 48 samples). The date of  
109 PCR confirmation and the prevalence of each variant at the time of diagnosis was used to  
110 infer the most likely infecting variant (see materials and methods and S1 Fig). All serum  
111 samples were processed as follows: first they were tested using a multiplex  
112 electrochemiluminescence assay against the spike (S), and nucleocapsid (N) proteins to  
113 quantify antibody concentrations. Further, serum samples were subjected to virus  
114 neutralisation assays (VNAs)[11] at a fixed dilution (1:50) using HIV (SARS-CoV-2)  
115 pseudotypes carrying the S glycoprotein of either SARS-CoV-2<sub>w</sub>, SARS-CoV-2 <sub>$\alpha$</sub> , SARS-CoV-  
116 2 <sub>$\delta$</sub> , or SARS-CoV-2<sub>o</sub>. Every sample that displayed 50% neutralisation to at least one SARS-  
117 CoV-2 variant was subject to antibody titration as previously described [12].

118 Quantification of S and N antibody levels for each group of patients is shown in Fig 2. As  
119 expected, sera from patients in the naive group (neither vaccinated nor infected) exhibited the  
120 lowest levels of anti-S antibodies because they had not been exposed to the Spike antigen of  
121 SARS-CoV-2. Patients that had been infected displayed higher levels of anti-S antibodies than  
122 vaccinated ones, whereas both were significantly lower to those observed in sera from patients  
123 that had been infected and vaccinated. Sera from patients that had been infected possessed  
124 higher levels of anti-N antibodies than those that had been infected and vaccinated (Fig 2). Of  
125 note, vaccinated patients had lower levels of anti-N than naive individuals. Overall, these  
126 results are consistent with previous reports suggesting that exposure to SARS-CoV-2 antigens  
127 by vaccination and infection results in higher levels of anti-SARS-CoV-2 antibodies than  
128 vaccination alone [13-15].

129 We next measured the neutralisation activity of each serum sample at a fixed dilution against  
130 SARS-CoV-2<sub>W</sub>, SARS-CoV-2<sub>α</sub>, SARS-CoV-2<sub>δ</sub>, and SARS-CoV-2<sub>o</sub> using virus pseudotypes.  
131 The efficiency of neutralisation varied depending on the SARS-CoV-2 variant tested (Fig 3A),  
132 and the immunological history of the patients (Fig 3B). When the chronological order of  
133 appearance of each variant is considered, a pattern of neutralisation reduction consistent with  
134 antigenic drift emerges. This is illustrated by the ladder-like distribution of the median  
135 percentage neutralisation (Fig 3A) and becomes even more evident when neutralisation levels  
136 are compared between SARS-CoV-2<sub>o</sub> and all the other variants, as the former, more evolved  
137 S, is neutralised less effectively. A similar trend of neutralisation reduction is observed  
138 between SARS-CoV-2<sub>W</sub> and SARS-CoV-2<sub>δ</sub> in the V and I<sub>V</sub> groups (Fig 3A). We also observed  
139 that virus neutralisation efficiency increases depending on the number and type of exposures,  
140 irrespective of the variant tested (Fig 3B). As a result, the I<sub>V</sub> group exhibited the highest  
141 neutralisation values against all variants (Fig 3B).

142 To quantify more accurately the neutralising potency of the antibody-mediated response  
143 among the four broad groups (N, V, I, I<sub>V</sub>), we titrated neutralising antibodies against each  
144 variant. Consistent with our previous results, neutralising titres significantly decreased as  
145 SARS-CoV-2 evolved (Fig 4A). Indeed, the aforementioned "ladder-like" effect was even more  
146 evident. Also consistent with our previous results, the number and type of antigen exposure  
147 events had a significant impact on virus neutralisation titres (Fig 4B). Patients derived from  
148 the I<sub>V</sub> group displayed significantly higher neutralising antibody titres compared to every other  
149 group across all variants (Fig 4B). In turn, infected patients exhibited variable titres against  
150 each variant when compared to vaccinated patients: for example, differences between these  
151 two groups were non-significant when SARS-CoV-2<sub>W</sub>, SARS-CoV-2<sub>α</sub> and SARS-CoV-2<sub>δ</sub> were  
152 compared. However, patients from the V group displayed significantly higher antibody titres  
153 against SARS-CoV-2<sub>o</sub>, albeit neutralisation efficiency was still very low. Collectively, these  
154 results suggest that SARS-CoV-2 antigenic evolution is directional (SARS-CoV-2 evolved to  
155 escape antibody-mediated immunity) and that the number and type of exposure events affect  
156 the breadth and potency of the antibody-mediated response.

157 To understand better how humoral immunity is affected by the antigenicity of SARS-CoV-2  
158 variants, we stratified the I and I<sub>V</sub> groups according to the strains that had infected the patients.  
159 This analysis revealed a trend consistent with homologous immunity as sera from patients that  
160 had been infected with SARS-CoV-2<sub>W</sub>, SARS-CoV-2<sub>α</sub> or SARS-CoV-2<sub>δ</sub> displayed highest  
161 potency against their infecting variants, albeit differences were not always statistically  
162 significant (Fig 5A). Notably, patients that had been vaccinated and infected with SARS-CoV-  
163 2<sub>δ</sub> showed overall the highest neutralisation potency against all variants (Fig 5B). As this group  
164 of patients had been exposed to the most phylogenetically distant antigens (SARS-CoV-2<sub>W</sub> by

165 vaccination and SARS-CoV-2 $\delta$  by infection), this result suggests not only that heterologous  
166 exposure results in a broader and more effective humoral response but also that the level of  
167 antigenic differences between variants affects the potency of the antibody-mediated response.  
168 In addition, we observed some differences among patients that had been vaccinated and  
169 infected with each SARS-CoV-2 variant: for example, patients that had been infected with  
170 SARS-CoV-2 $\alpha$  exhibited lower neutralisation efficiency against SARS-CoV-2 $\delta$  than against  
171 SARS-CoV-2 $\omega$  or SARS-CoV-2 $\alpha$  (Fig 5A). Titration of neutralising antibodies enabled us to  
172 quantify neutralisation biases towards specific SARS-CoV-2 variants. Generally, patients  
173 infected by specific variants exhibited significantly different neutralising titres against other  
174 SARS-CoV-2 variants (Fig 6A and B) and this effect was also evident among vaccinated and  
175 infected patients. For example, patients infected with SARS-CoV-2 $\delta$  exhibited high levels of  
176 neutralising antibodies against SARS-CoV-2 $\delta$  but significantly lower titres against all other  
177 variants (Fig 6A), whereas patients infected with SARS-CoV-2 $\omega$  or SARS-CoV-2 $\alpha$  displayed  
178 similar levels of neutralising antibodies against SARS-CoV-2 $\omega$  and SARS-CoV-2 $\alpha$  but lower  
179 levels against SARS-CoV-2 $\delta$  and even lower against SARS-CoV-2 $\omicron$  (Fig 6A). Overall, titres  
180 in patients that had been infected only were lower to those measured in patients that had been  
181 infected and vaccinated (Fig 6A and B). The only exception was observed in sera from patients  
182 infected with SARS-CoV-2 $\delta$ , whose neutralising antibody titres against the homologous  
183 antigen was similar in vaccinated and infected patients (Fig 6B). Neutralising antibody  
184 responses seemed to display immunological preferences: for example, patients that had been  
185 vaccinated and infected with SARS-CoV-2 $\delta$  exhibited significantly higher neutralisation levels  
186 against SARS-CoV-2 $\omega$  (the vaccine variant) than SARS-CoV-2 $\delta$  (the infecting variant),  
187 suggesting the stimulation of an anamnestic response. In contrast, patients that had been  
188 vaccinated but infected with SARS-CoV-2 $\alpha$  showed similar neutralising antibody titres against  
189 SARS-CoV-2 $\omega$  and SARS-CoV-2 $\alpha$ . Of note, when neutralising antibody titres were compared  
190 across all patient groups, those vaccinated and infected with SARS-CoV-2 $\delta$  or infected with  
191 SARS-CoV-2 $\omega$  and then vaccinated, displayed the highest titres against all variants (Fig 6B),  
192 consistent with the notion that immunity conferred via infection *and* vaccination results in  
193 broader and more potent humoral responses.

194 As the I<sub>v</sub> group exhibited the highest antibody titres against all variants, we wanted to  
195 determine if the order in which patients were exposed to SARS-CoV-2 (either vaccination first  
196 or infection first) played any role in the breadth and potency of antibody mediated  
197 neutralisation. To test this, we focused on the I $\alpha$ <sub>v</sub> group, which exhibited a similar number of  
198 patients that had been either infected first (n=28) or vaccinated first (n=41). Sera from patients  
199 that had been infected first and then vaccinated exhibited significantly higher neutralisation  
200 efficiency against every variant (Fig 7A) and also higher titres of neutralising antibodies (Fig

201 7B). Overall, this result highlights that the type of exposure (vaccination or infection) and the  
202 order in which different types of exposure occur have a significant impact on the breadth and  
203 potency of humoral immunity against SARS-CoV-2.

## 204 **Discussion**

205 Our study shows that the immunological landscape of SARS-CoV-2 is highly heterogeneous  
206 and has been shaped by the complex interplay between host immunity and virus evolution.  
207 Infection by, or vaccination against, SARS-CoV-2 does not elicit lifelong immunity[16, 17] but  
208 instead result in a variety of immune phenotypes, which are likely to influence both  
209 transmission dynamics and disease outcomes. We demonstrate that multiple factors influence  
210 the breadth and potency of the antibody-mediated response against SARS-CoV-2 and include  
211 antigenicity of the exposing pathogen, number of exposures, and exposure type (infection  
212 and/or vaccination). While T-cell responses play an important role in SARS-CoV-2  
213 immunity[18], we could not evaluate the impact of cellular-mediated immunity due to the nature  
214 of our samples (i.e., sera). In line with previous studies, we show that mutations that appeared  
215 during SARS-CoV-2 evolution reduce antibody mediated neutralisation[19, 20], suggesting  
216 that evolution of the spike gene of SARS-CoV-2 is directional and driven by immune selection.  
217 This is consistent with reports of reinfections by novel variants[21, 22]. Our results showing  
218 that all serum samples exhibited lowest neutralising activity against pseudoviruses carrying  
219 the spike glycoprotein of SARS-CoV-2o (Figs 4A and 6A) support this view. As all currently  
220 licenced vaccine preparations express the S glycoprotein of SARS-CoV-2<sub>w</sub>, it is expected that  
221 the risk of reinfections in vaccinated-only individuals increases as SARS-CoV-2 evolves.  
222 Similarly, for infected-only individuals, the risk of reinfection will likely increase as the antigenic  
223 distance between the viruses involved in primary and secondary infection increases, and thus  
224 is a function of time. Our results also show that more exposure events result in broader and  
225 more potent antibody-mediated responses (Figs 3B and 5B), and this protective effect is also  
226 influenced by the antigenic nature of the viruses involved in the primary infection (or  
227 vaccination) and subsequent infections. This finding suggests that updates of the vaccine  
228 strains (or development of multivalent vaccines) will improve protection against evolving  
229 variants, and also that increased transmission of antigenically divergent SARS-CoV-2 viruses  
230 among previously exposed individuals will result in future higher levels of protection. We also  
231 show that primary infection followed by vaccination results in more potent humoral responses  
232 (Fig 7), which indicates that the type and order of exposure events have a significant impact  
233 on the breadth and potency of the antibody mediated response. These findings are consistent  
234 with recent reports [13, 14, 23]. While it is not advisable to promote the acquisition of SARS-  
235 CoV-2 immunity by natural infection given the risk of severe disease and/or death due to

236 COVID-19 in naive individuals, our results suggest that vaccines based on live-attenuated  
237 viruses might provide increased protection.

238 In sum, our work underscores the complexity of the immunological landscape of SARS-CoV-  
239 2. While our results will inform the development of better epidemiological models to predict  
240 the future transmission dynamics of SARS-COV-2[24], further clinical studies are needed to  
241 determine the impact of exposure history on disease presentation to prepare better for the  
242 future disease burden of COVID-19 as this disease becomes endemic.

## 243 **Materials and Methods**

244 **Ethics statement.** Ethical approval was provided by NHSGGC Biorepository (application  
245 550).

246 **Serum samples.** Random residual biochemistry serum samples (~41,000) from primary  
247 (general practices) and secondary (hospitals) healthcare settings were collected by the  
248 NHSGGC Biorepository between the 31st of March 2020 and 22nd of September 2021.  
249 Associated metadata included date of sample collection, date of positive PCR result, date of  
250 first and second vaccination and vaccine manufacturer. Seronegative samples were selected  
251 based on their ELISA results (SARS-CoV-2 S1 or SARS-CoV-2 RBD) and the absence of a  
252 positive PCR test result or record of vaccination. Samples from vaccinated patients were  
253 selected based on their ELISA result (SARS-CoV-2 S1 or SARS-CoV-2 RBD), record of  
254 vaccination with 1 or 2 doses at least 14 days prior to blood collection and absence of a  
255 positive PCR test result for at least 14 days after sampling. Samples from infected patients  
256 had no record of vaccination, were ELISA positive (SARS-CoV-2 S1 or SARS-CoV-2 RBD)  
257 and had a positive PCR test result at least 14 days before sample collection. Samples from  
258 infected and vaccinated patients were identified by their positive ELISA result, the presence  
259 of positive PCR test result and record of vaccination with 1 or 2 doses at least 14 days prior  
260 to blood collection. Samples from infected and infected and vaccinated patients were further  
261 stratified to infecting variants (based on the date of the positive PCR test), by identifying key  
262 time periods during which each variant was most predominant. All serum samples were  
263 inactivated at 56°C for 30 minutes before being tested.

264 **Cells.** HEK293T and 293-ACE2 cells were maintained at 37°C, 5% CO<sub>2</sub>, in Dulbecco's  
265 modified Eagle's medium (DMEM) supplemented with 10% foetal bovine serum, 2mM L-  
266 glutamine, 100µg/ml streptomycin and 100 IU/ml penicillin. HEK293 cells were used to  
267 produce HEK293-ACE2 target cells by stable transduction with pSCRPSY-hACE2 and were  
268 maintained in complete DMEM supplemented with 2µg/ml puromycin. HEK293T cells were  
269 used for the generation of HIV(SARS-CoV-2) pseudotypes.



270 **IgG quantification.** IgG antibodies against SARS-CoV-2 the spike and nucleocapsid proteins  
271 were measured using an MSD V-PLEX COVID-19 Coronavirus Panel 2 (K15369) kit. Multiplex  
272 Meso Scale Discovery electrochemiluminescence (MSD-ECL) assays were performed  
273 according to the manufacturer's instructions. Briefly, 96-well plates were blocked at room  
274 temperature for at least 30 minutes. Plates were then washed; samples were diluted 1:5000  
275 and added to the plates along with serially diluted reference standard and serology controls.  
276 Plates were incubated for two hours and further washed. SULFO-TAG detection antibody was  
277 added, and plates were incubated for one hour. After incubation, plates were washed and read  
278 using a MESO Sector S 600 plate reader. Data were generated by Methodological Mind  
279 software and analysed using MSD Discovery Workbench (v4.0). Results were normalised to  
280 standard(s) and expressed as MSD arbitrary units per ml (AU/ml).

281 **Neutralisation assays.** Pseudotype-based neutralisation assays were carried out as  
282 described previously[11]. HEK293T cells were transfected with the appropriate SARS-CoV-2  
283 Spike gene expression vector (Wuhan, Alpha, Delta, or Omicron) together with p8.9171 and  
284 pCSFLW72 using polyethylenimine (PEI, Polysciences, Warrington, USA). HIV (SARS-CoV-  
285 2) pseudotype-containing supernatants were harvested 48 hours post-transfection, aliquoted  
286 and frozen at -80°C prior to use. Gene constructs bearing the Wuhan (D614G), Alpha  
287 (B.1.1.7), Delta (B.1.617.2) and Omicron (B.1.1.529) Spike genes were based on the codon-  
288 optimised spike sequence of SARS-CoV-2 and generated by GenScript Biotech. Constructs  
289 bore the following mutations relative to the Wuhan-Hu-1 sequence (GenBank: MN908947):  
290 Wuhan(D614G) – D614G; Omicron (BA.1, B.1.1.529) - A67V, Δ69-70, T95I, G142D/Δ143-  
291 145, Δ211/L212I, ins214EPE, G339D, S371L, S373P, S375F, K417N, N440K, G446S,  
292 S477N, T478K, E484A, Q493R, G496S, Q498R, N501Y, Y505H, T547K, D614G, H655Y,  
293 N679K, P681H, N764K, D796Y, N856K, Q954H, N969K, L981F; Alpha (B.1.1.7)- L18F, Δ69-  
294 70, Δ144, N501Y, A570D, P681H, T716I, S982A, D1118H; Delta (B.1.617.2)- T19R, G142D,  
295 Δ156-157, R158G, L452R, T478K, D614G, P681R, D950N.

296 Neutralisation efficiency was measured first using a fixed dilution of serum samples in  
297 duplicates. Samples with neutralising activity ≥ 50% relative to the no serum control were then  
298 titrated by serial dilutions. Each sample was serially diluted in triplicate from 1:50 to 1:36450  
299 in complete DMEM, incubated for 1 hour with HIV (SARS-CoV-2) pseudotypes, and plated  
300 onto HEK239-ACE2 target cells. After 48 hours, luciferase activity was measured by adding  
301 Steadylite Plus chemiluminescence substrate and analysed using a Perkin Elmer EnSight  
302 multimode plate reader. Antibody titres were estimated by interpolating the point at which  
303 infectivity had been reduced to 50% of the value for the no serum control samples. Samples  
304 that did not have an antibody titre were arbitrary assigned a value of 50 (the lowest dilution  
305 available).

306 **Statistical analysis.** Shapiro-Wilk tests were performed to assess data homoscedasticity. As  
307 data were found not to be normally distributed, non-parametric pairwise Wilcoxon Rank Sum  
308 tests were carried out to assess statistically significant differences in antibody levels between  
309 groups and viruses. Holm's method was used to adjust p-values to account for multiple  
310 statistical comparisons. Separate tests were performed for each group when comparing  
311 between viruses, and for each virus when comparing between groups. Pairwise comparisons  
312 were presented as connected dotplots, highlighting the significance levels of each of the paired  
313 comparisons. All analyses and data visualisations were executed using the stats[25] and  
314 ggplot2[26] packages respectively, from R version 4.0.5.

315 **Data availability.** Data of each sample, including metadata and results of each assays, are  
316 included in S1 Appendix.

317 **Acknowledgements.** We thank Massimo Palmarini for scientific advice and the NHS Greater  
318 Glasgow and Clyde Biorepository for providing serum samples.

## 319 320 **References** 321

- 322 1. Zhu N, Zhang D, Wang W, Li X, Yang B, Song J, et al. A Novel Coronavirus from  
323 Patients with Pneumonia in China, 2019. *N Engl J Med.* 2020;382(8):727-33. Epub  
324 2020/01/25. doi: 10.1056/NEJMoa2001017. PubMed PMID: 31978945; PubMed Central  
325 PMCID: PMCPMC7092803.
- 326 2. Davies NG, Abbott S, Barnard RC, Jarvis CI, Kucharski AJ, Munday JD, et al.  
327 Estimated transmissibility and impact of SARS-CoV-2 lineage B.1.1.7 in England. *Science.*  
328 2021;372(6538). Epub 2021/03/05. doi: 10.1126/science.abg3055. PubMed PMID:  
329 33658326; PubMed Central PMCID: PMCPMC8128288.
- 330 3. Tegally H, Wilkinson E, Giovanetti M, Iranzadeh A, Fonseca V, Giandhari J, et al.  
331 Detection of a SARS-CoV-2 variant of concern in South Africa. *Nature.*  
332 2021;592(7854):438-43. Epub 2021/03/11. doi: 10.1038/s41586-021-03402-9. PubMed  
333 PMID: 33690265.
- 334 4. Faria NR, Mellan TA, Whittaker C, Claro IM, Candido DDS, Mishra S, et al.  
335 Genomics and epidemiology of the P.1 SARS-CoV-2 lineage in Manaus, Brazil. *Science.*  
336 2021;372(6544):815-21. Epub 2021/04/16. doi: 10.1126/science.abh2644. PubMed PMID:  
337 33853970; PubMed Central PMCID: PMCPMC8139423.
- 338 5. Viana R, Moyo S, Amoako DG, Tegally H, Scheepers C, Althaus CL, et al. Rapid  
339 epidemic expansion of the SARS-CoV-2 Omicron variant in southern Africa. *Nature.* 2022.  
340 Epub 2022/01/19. doi: 10.1038/s41586-022-04411-y. PubMed PMID: 35042229.
- 341 6. GOV.UK. Coronavirus (COVID-19) in the UK-Vaccinations. Available from:  
342 <https://coronavirus.data.gov.uk/details/vaccinations>.
- 343 7. Pulliam JRC, van Schalkwyk C, Govender N, von Gottberg A, Cohen C, Groome MJ,  
344 et al. Increased risk of SARS-CoV-2 reinfection associated with emergence of Omicron in  
345 South Africa. *Science.* 2022:eabn4947. Epub 2022/03/16. doi: 10.1126/science.abn4947.  
346 PubMed PMID: 35289632.
- 347 8. Pouwels KB, Pritchard E, Matthews PC, Stoesser N, Eyre DW, Vihta KD, et al.  
348 Effect of Delta variant on viral burden and vaccine effectiveness against new SARS-CoV-2  
349 infections in the UK. *Nat Med.* 2021;27(12):2127-35. Epub 2021/10/16. doi:

- 350 10.1038/s41591-021-01548-7. PubMed PMID: 34650248; PubMed Central PMCID:  
351 PMCPMC8674129.
- 352 9. Earle KA, Ambrosino DM, Fiore-Gartland A, Goldblatt D, Gilbert PB, Siber GR, et  
353 al. Evidence for antibody as a protective correlate for COVID-19 vaccines. *Vaccine*.  
354 2021;39(32):4423-8. Epub 2021/07/03. doi: 10.1016/j.vaccine.2021.05.063. PubMed PMID:  
355 34210573; PubMed Central PMCID: PMCPMC8142841.
- 356 10. Corbett KS, Nason MC, Flach B, Gagne M, O'Connell S, Johnston TS, et al. Immune  
357 correlates of protection by mRNA-1273 vaccine against SARS-CoV-2 in nonhuman  
358 primates. *Science*. 2021;373(6561):eabj0299. Epub 2021/09/17. doi:  
359 10.1126/science.abj0299. PubMed PMID: 34529476; PubMed Central PMCID:  
360 PMCPMC8449013.
- 361 11. Hughes EC, Amat JAR, Haney J, Parr YA, Logan N, Palmateer N, et al. Severe Acute  
362 Respiratory Syndrome Coronavirus 2 Serosurveillance in a Patient Population Reveals  
363 Differences in Virus Exposure and Antibody-Mediated Immunity According to Host  
364 Demography and Healthcare Setting. *J Infect Dis*. 2021;223(6):971-80. Epub 2020/12/29.  
365 doi: 10.1093/infdis/jiaa788. PubMed PMID: 33367847; PubMed Central PMCID:  
366 PMCPMC7798933.
- 367 12. Davis C, Logan N, Tyson G, Orton R, Harvey WT, Perkins JS, et al. Reduced  
368 neutralisation of the Delta (B.1.617.2) SARS-CoV-2 variant of concern following  
369 vaccination. *PLoS Pathog*. 2021;17(12):e1010022. Epub 2021/12/03. doi:  
370 10.1371/journal.ppat.1010022. PubMed PMID: 34855916; PubMed Central PMCID:  
371 PMCPMC8639073.
- 372 13. Bates TA, McBride SK, Leier HC, Guzman G, Lyski ZL, Schoen D, et al.  
373 Vaccination before or after SARS-CoV-2 infection leads to robust humoral response and  
374 antibodies that effectively neutralize variants. *Sci Immunol*. 2022;7(68):eabn8014. Epub  
375 2022/01/26. doi: 10.1126/sciimmunol.abn8014. PubMed PMID: 35076258.
- 376 14. Reynolds CJ, Gibbons JM, Pade C, Lin KM, Sandoval DM, Pieper F, et al.  
377 Heterologous infection and vaccination shapes immunity against SARS-CoV-2 variants.  
378 *Science*. 2022;375(6577):183-92. Epub 2021/12/03. doi: 10.1126/science.abm0811. PubMed  
379 PMID: 34855510.
- 380 15. Walls AC, Sprouse KR, Bowen JE, Joshi A, Franko N, Navarro MJ, et al. SARS-  
381 CoV-2 breakthrough infections elicit potent, broad, and durable neutralizing antibody  
382 responses. *Cell*. 2022;185(5):872-80 e3. Epub 2022/02/07. doi: 10.1016/j.cell.2022.01.011.  
383 PubMed PMID: 35123650; PubMed Central PMCID: PMCPMC8769922.
- 384 16. Chia WN, Zhu F, Ong SWX, Young BE, Fong SW, Le Bert N, et al. Dynamics of  
385 SARS-CoV-2 neutralising antibody responses and duration of immunity: a longitudinal  
386 study. *Lancet Microbe*. 2021;2(6):e240-e9. Epub 2021/03/30. doi: 10.1016/S2666-  
387 5247(21)00025-2. PubMed PMID: 33778792; PubMed Central PMCID: PMCPMC7987301.
- 388 17. Thomas SJ, Moreira ED, Jr., Kitchin N, Absalon J, Gurtman A, Lockhart S, et al.  
389 Safety and Efficacy of the BNT162b2 mRNA Covid-19 Vaccine through 6 Months. *N Engl J*  
390 *Med*. 2021;385(19):1761-73. Epub 2021/09/16. doi: 10.1056/NEJMoa2110345. PubMed  
391 PMID: 34525277; PubMed Central PMCID: PMCPMC8461570.
- 392 18. Moss P. The T cell immune response against SARS-CoV-2. *Nat Immunol*.  
393 2022;23(2):186-93. Epub 2022/02/03. doi: 10.1038/s41590-021-01122-w. PubMed PMID:  
394 35105982.
- 395 19. Ibarondo FJ, Hofmann C, Ali A, Ayoub P, Kohn DB, Yang OO. Previous Infection  
396 Combined with Vaccination Produces Neutralizing Antibodies with Potency against SARS-  
397 CoV-2 Variants. *mBio*. 2021;12(6):e0265621. Epub 2021/12/08. doi: 10.1128/mBio.02656-  
398 21. PubMed PMID: 34872349; PubMed Central PMCID: PMCPMC8649753.

- 399 20. Cele S, Jackson L, Khoury DS, Khan K, Moyo-Gwete T, Tegally H, et al. Omicron  
400 extensively but incompletely escapes Pfizer BNT162b2 neutralization. *Nature*.  
401 2022;602(7898):654-6. Epub 2022/01/12. doi: 10.1038/s41586-021-04387-1. PubMed  
402 PMID: 35016196; PubMed Central PMCID: PMC8866126.
- 403 21. Levine-Tiefenbrun M, Yelin I, Alapi H, Katz R, Herzel E, Kuint J, et al. Viral loads  
404 of Delta-variant SARS-CoV-2 breakthrough infections after vaccination and booster with  
405 BNT162b2. *Nat Med*. 2021;27(12):2108-10. Epub 2021/11/04. doi: 10.1038/s41591-021-  
406 01575-4. PubMed PMID: 34728830.
- 407 22. Mlcochova P, Kemp SA, Dhar MS, Papa G, Meng B, Ferreira I, et al. SARS-CoV-2  
408 B.1.617.2 Delta variant replication and immune evasion. *Nature*. 2021;599(7883):114-9.  
409 Epub 2021/09/07. doi: 10.1038/s41586-021-03944-y. PubMed PMID: 34488225; PubMed  
410 Central PMCID: PMC8566220.
- 411 23. Keeton R, Tincho MB, Ngomti A, Baguma R, Benede N, Suzuki A, et al. T cell  
412 responses to SARS-CoV-2 spike cross-recognize Omicron. *Nature*. 2022. Epub 2022/02/02.  
413 doi: 10.1038/s41586-022-04460-3. PubMed PMID: 35102311.
- 414 24. Saad-Roy CM, Wagner CE, Baker RE, Morris SE, Farrar J, Graham AL, et al.  
415 Immune life history, vaccination, and the dynamics of SARS-CoV-2 over the next 5 years.  
416 *Science*. 2020;370(6518):811-8. Epub 2020/09/23. doi: 10.1126/science.abd7343. PubMed  
417 PMID: 32958581; PubMed Central PMCID: PMC857410.
- 418 25. Team RC. R: A language and environment for statistical computing. 2013.
- 419 26. Wickham H. ggplot2. Wiley Interdisciplinary Reviews: Computational Statistics.  
420 2011;3(2):180-5.

422 **Figures**

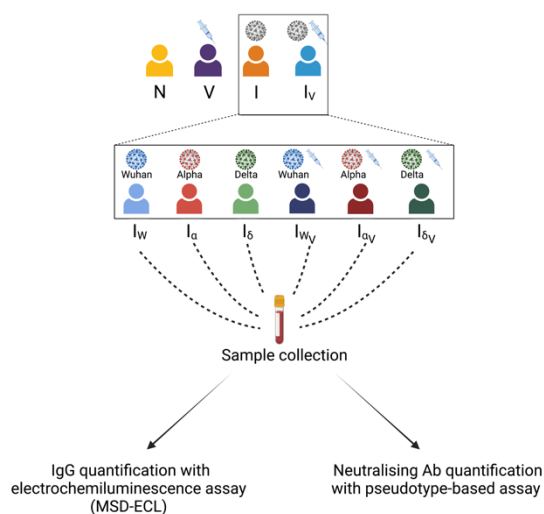

423 **Figure 1.** Schematic representation of the study design. Coloured silhouettes represent different patient  
424 groups (N= naive, V= vaccinated, I= infected, I<sub>V</sub>= infected and vaccinated). I and I<sub>V</sub> were further stratified  
425 based on the infecting strain (I<sub>W</sub>= infected with SARS-CoV-2<sub>W</sub>, I<sub>α</sub>= infected with SARS-CoV-2<sub>α</sub>, I<sub>δ</sub>=  
426 infected with SARS-CoV-2<sub>δ</sub>, I<sub>WV</sub>= vaccinated and infected with SARS-CoV-2<sub>W</sub>, I<sub>αV</sub>= vaccinated and  
427 infected with SARS-CoV-2<sub>α</sub>, I<sub>δV</sub>= vaccinated and infected with SARS-CoV-2<sub>δ</sub>). Serum samples were  
428 tested for the presence of IgG antibodies against SARS-CoV-2 S and N, and also tested in virus  
429 neutralisation assays using pseudotyped viruses carrying the S glycoprotein of specific SARS-CoV-2  
430 variants (see methods).  
431

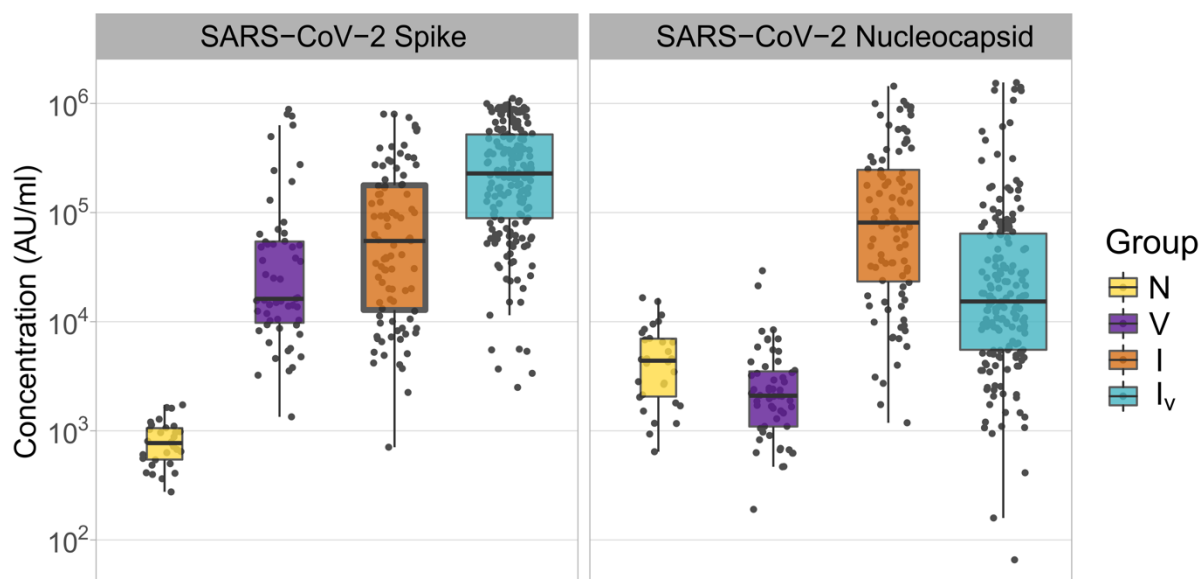

432  
433 **Figure 2.** Concentrations of SARS-CoV-2 Spike and Nucleocapsid antibodies in samples derived from  
434 patients with different histories of SARS-CoV-2 exposure. The name of the antigens is shown at the top  
435 of each panel. Patient groups are defined as N: naive (yellow); V: vaccinated (purple); I: infected  
436 (orange); I<sub>V</sub>: infected and vaccinated (cyan). Antibody concentrations are shown in MSD arbitrary  
437 units/ml. Boxplots displayed the interquartile range and median values.  
438

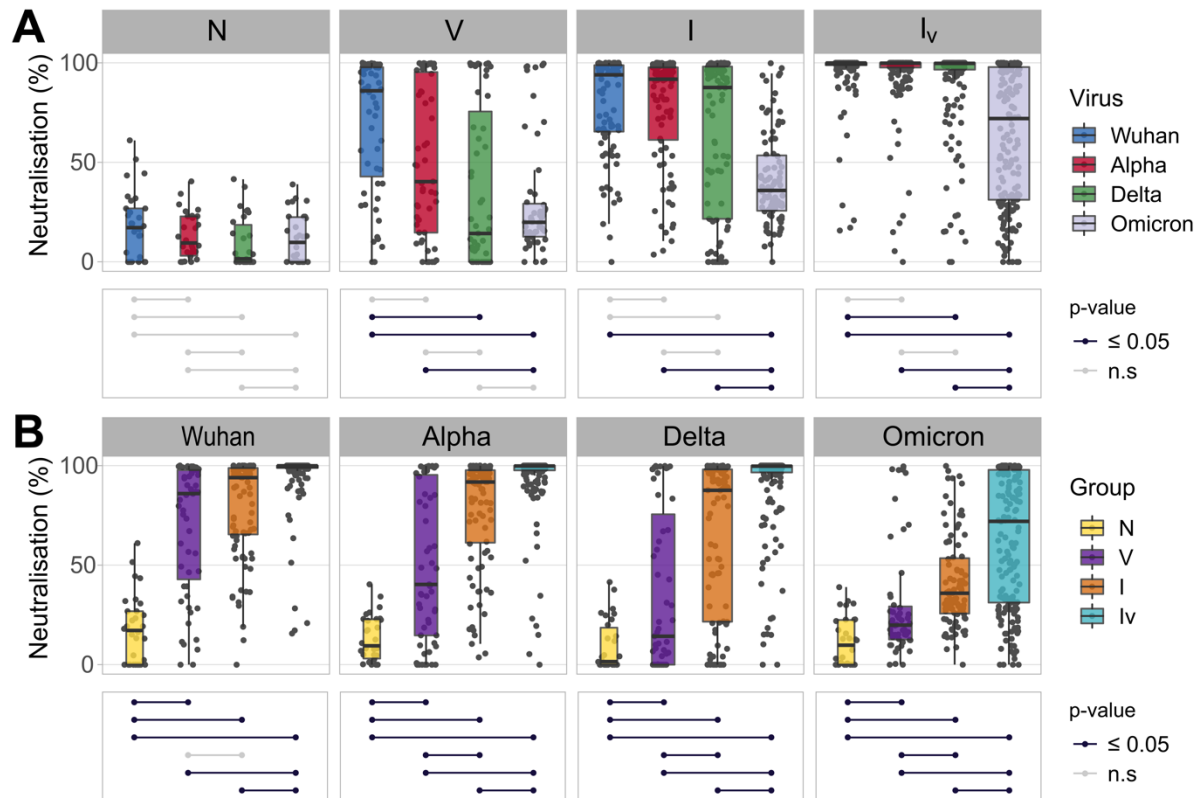

439

440 **Figure 3.** Neutralising responses elicited against pseudotyped viruses carrying the S protein of different  
441 SARS-CoV-2 variants according to patient exposure history to SARS-CoV-2. (A) Sera from patients  
442 were grouped based on immunological histories (N: naive; V: vaccinated; I: infected; Iv: infected and  
443 vaccinated). Neutralising activity was measured using Wuhan (blue), Alpha (red), Delta (green) and  
444 Omicron (grey) spike glycoprotein bearing HIV(SARS-CoV-2) pseudotypes and plotted per patient  
445 group (A) and per SARS-CoV-2 S variant (B). Neutralisation was measured at a fixed dilution (1:50).  
446 Each point represents the mean of two replicates. Boxplots displayed the interquartile range and median  
447 values. Significance levels between patient groups or pseudotyped viruses were tested using pairwise  
448 Wilcoxon test, and are shown in bottom panels as connected dotplots.  
449

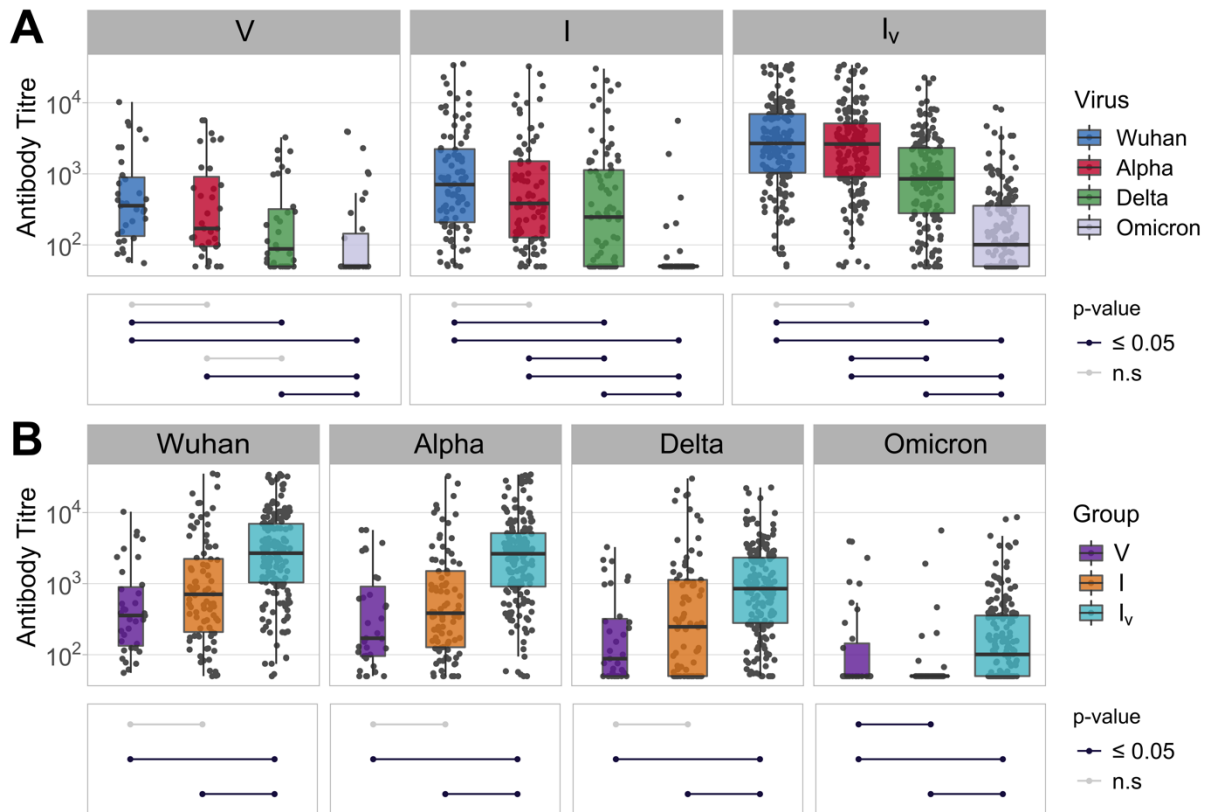

450

451 **Figure 4.** Neutralising antibody titres against SARS-CoV-2 variants in sera from patients with different  
452 histories of SARS-CoV-2 exposure (V: vaccinated (purple); I: infected (orange); I<sub>v</sub>: infected and  
453 vaccinated (cyan)). Neutralising activity was measured using Wuhan (blue), Alpha (red), Delta (green)  
454 and Omicron (grey) spike glycoprotein bearing HIV(SARS-CoV-2) pseudotypes and plotted per patient  
455 group (A) and per SARS-CoV-2 S variant (B). Each point represents the mean of three replicates.  
456 Boxplots displayed the interquartile range and median values. Significance levels between patient  
457 groups or pseudotyped viruses were tested using pairwise Wilcoxon test, and are shown in bottom  
458 panels as connected dotplots.  
459

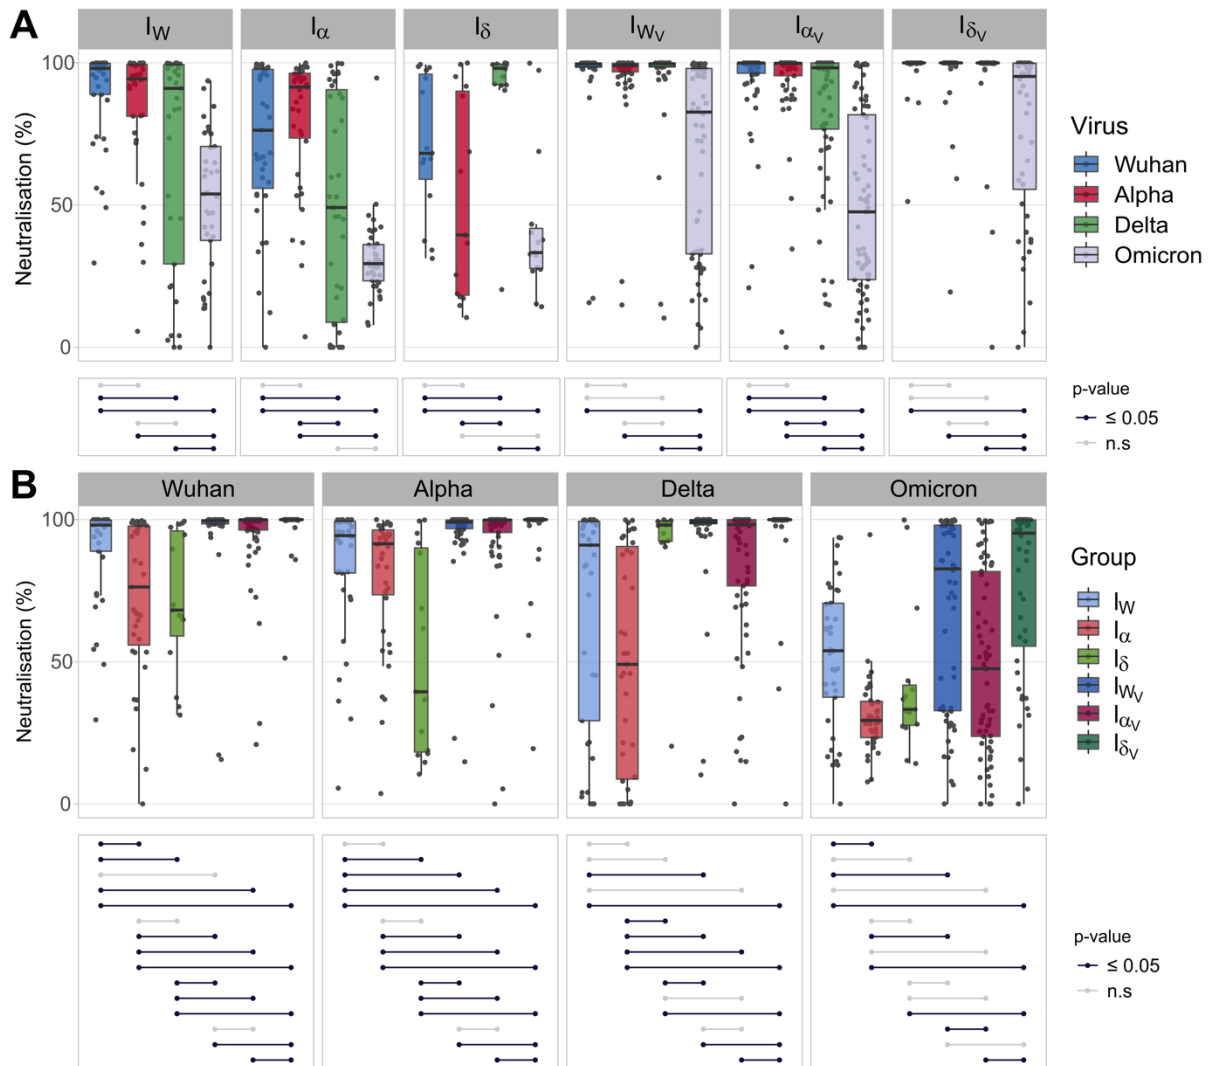

460  
 461 **Figure 5.** Neutralising responses elicited against pseudotyped viruses carrying the S protein of different  
 462 SARS-CoV-2 variants according to patient exposure history. (A) Sera from patients were grouped based  
 463 on immunological histories taking into account the infecting SARS-CoV-2 variant ( $I_W$ : infected with  
 464 SARS-CoV-2<sub>W</sub> (light blue),  $I_\alpha$ : infected with SARS-CoV-2<sub>α</sub> (light red),  $I_\delta$ : infected with SARS-CoV-2<sub>δ</sub>  
 465 (light green),  $I_{WV}$  infected with SARS-CoV-2<sub>W</sub> and vaccinated (dark blue),  $I_{\alpha V}$ : infected with SARS-CoV-2<sub>α</sub>  
 466 and vaccinated,  $I_{\delta V}$ : infected with SARS-CoV-2<sub>δ</sub> and vaccinated, (dark green)).  
 467 Neutralising activity was measured using Wuhan (blue), Alpha (red), Delta (green) and Omicron (grey)  
 468 spike glycoprotein bearing HIV(SARS-CoV-2) pseudotypes and plotted per patient group (A) and per  
 469 SARS-CoV-2 S variant (B). Neutralisation was measured at a fixed dilution (1:50). Each point  
 470 represents the mean of two replicates. Boxplots displayed the interquartile range and median values.  
 471 Significance levels between patient groups or pseudotyped viruses were tested using pairwise Wilcoxon  
 472 test, and are shown in bottom panels as connected dotplots.  
 473



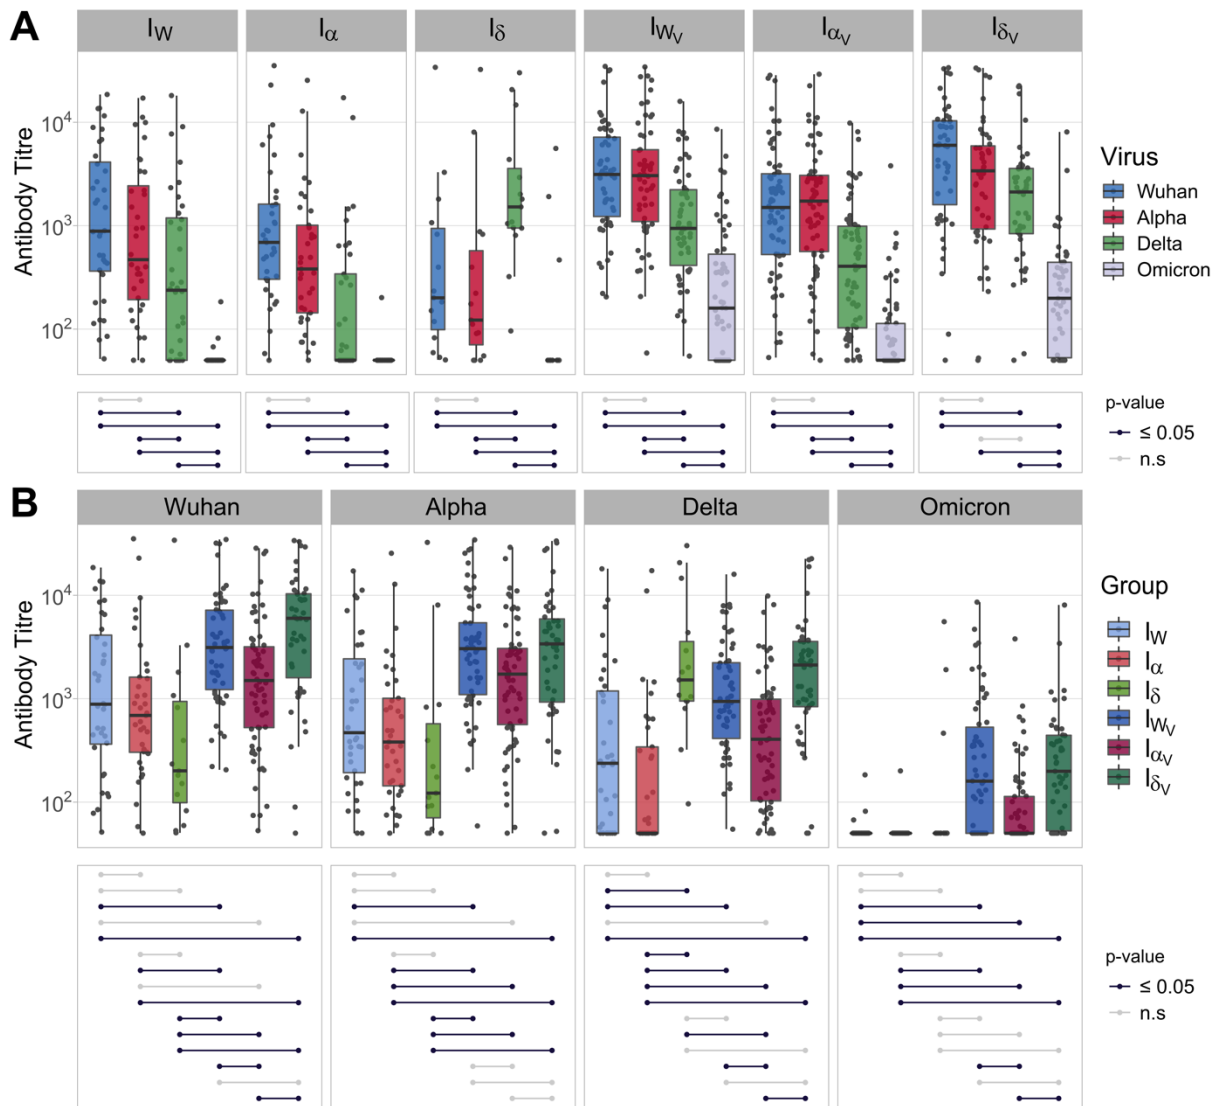

474  
475  
476  
477  
478  
479  
480  
481  
482  
483  
484  
485  
486

**Figure 6.** Neutralising antibody titres against SARS-CoV-2 variants in sera from patients with different histories of SARS-CoV-2 exposure taking into account the infecting SARS-CoV-2 variant ( $I_W$ : infected with SARS-CoV-2<sub>W</sub> (light blue),  $I_\alpha$ : infected with SARS-CoV-2 <sub>$\alpha$</sub>  (light red),  $I_\delta$ : infected with SARS-CoV-2 <sub>$\delta$</sub>  (light green),  $I_{WV}$  infected with SARS-CoV-2<sub>W</sub> and vaccinated (dark blue),  $I_{\alpha V}$ : infected with SARS-CoV-2 <sub>$\alpha$</sub>  and vaccinated (dark red),  $I_{\delta V}$ : infected with SARS-CoV-2 <sub>$\delta$</sub>  and vaccinated (dark green)). Neutralising activity was measured using Wuhan (blue), Alpha (red), Delta (green) and Omicron (grey) spike glycoprotein bearing HIV(SARS-CoV-2) pseudotypes and plotted per patient group (A) and per SARS-CoV-2 S variant (B). Each point represents the mean of three replicates. Boxplots displayed the interquartile range and median values. Significance levels between patient groups or pseudotyped viruses were tested using pairwise Wilcoxon test, and are shown in bottom panels as connected dotplots.

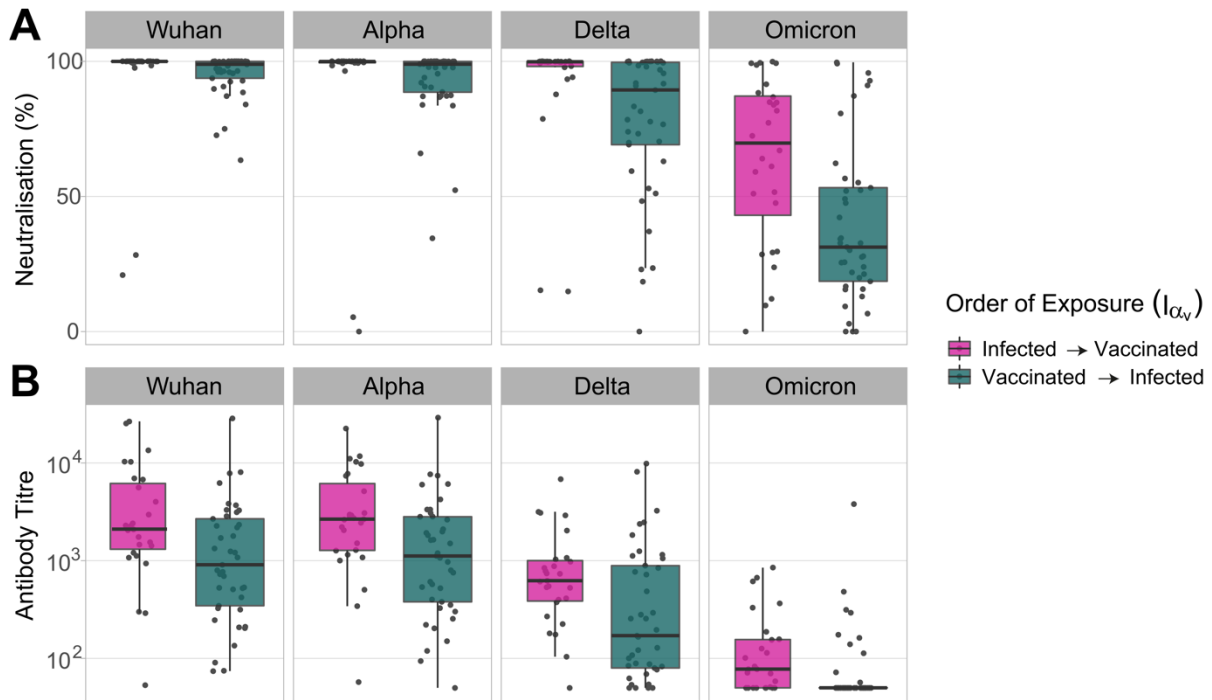

487  
488  
489  
490  
491  
492  
493  
494  
495  
496  
497  
498  
499

**Figure 7.** Neutralising responses against pseudotyped viruses carrying the S protein of different SARS-CoV-2 variants were measured (A) and titrated (B) in patients that had been either infected and vaccinated (pink) or vaccinated and infected (seagreen), with SARS-CoV-2 $\alpha$ . Serum samples were subject to neutralisation assays using lentiviruses pseudotyped with the S protein of SARS-CoV-2<sub>W</sub> (Wuhan) SARS-CoV-2 $\alpha$  (Alpha), SARS-CoV-2 $\delta$  (Delta) or SARS-CoV-2 $\omicron$  (Omicron). (A) Neutralisation was measured at a fixed dilution (1:50) and each data point is the mean of two replicates. (B) Antibody titres were calculated by interpolating the point at which infectivity had been reduced to 50% of the value for the non-serum control samples. Each point represents the mean of three replicates.

### Supporting Information

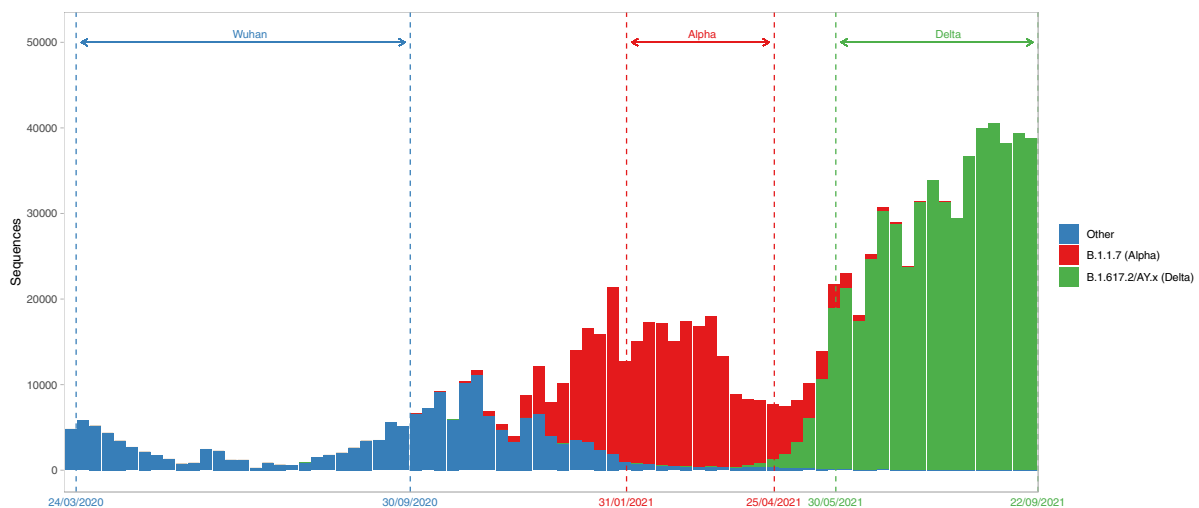

500  
501  
502  
503  
504

**S1 Figure.** Number of SARS-CoV-2 variants sequenced in the United Kingdom between March 2020 and September 2021. Variants are colour-coded, and the key is shown on the right of the graph. Vertical dashed lines show the time periods used to select samples as described in the main text and methods.

**S1 Appendix.** Assay results and metadata of each serum sample used in this study.
